# Supplementary material for: Rationale and Design of Heart Failure Prevalence and Evolution of Heart Failure in Diabetes Mellitus Type II Patients at High Risk (HF-LanDMark Study)
Source: MDPI journal article supplement (doi:10.3390/jcm12196319), 2023-09-30
Supplement: s1 [file s1]

# **Rationale and design of Heart Failure prevalence and evolution of Heart Failure in Diabetes**

## **Mellitus type II patients at high risk (HF-LanDMark study)**

### **Supplementary Materials**

#### **Table of contents**

|                                                           |   |
|-----------------------------------------------------------|---|
| 1. HF-LanDMark Site Investigators/ Site Coordinators..... | 2 |
| 2. Inclusion criteria.....                                | 3 |
| 3. Exclusion criteria.....                                | 5 |
| 4. Primary outcome.....                                   | 6 |
| 5. Secondary outcomes.....                                | 7 |
| 6. Exploratory outcomes.....                              | 9 |

## **1. HF-LanDMark Site Investigators/ Site Coordinators**

**Attikon University Hospital:** John Parissis, Christos Georgiou, Vasiliki Bistola, Effie Polyzogopoulou, Antonis Boultadakis, Georgia Psarrou; **Hippokration General Hospital Athens:** Charalambos Vlachopoulos, Ioanna Dima; **"G. Gennimatas" Athens General Hospital:** Apostolos Karavidas, Despoina Balta; **Hippokration General Hospital of Thessaloniki:** Vassilios Vassilikos, Chalil Tsavousoglou, Christodoulos Papadopoulos, Constantinos Bakogiannis, Maria Toumberleka; **Alexandra General Hospital:** John Kanakakis, Argyrios Ntalianis, Maria Tselegkidi, Alexia Mareti; **Department of Cardiology, University of Patras:** Periklis Davlourous, Grigorios Tsigkas, Eleni Koufou; **Cardiology Department, Democritus University of Thrace:** Dimitrios Tziakas, George Chalikias, Vasiliki Tsaliki, Alexandros Markakis; **Evangelismos Hospital:** Ioannis Alexanian, Sotirios Xydonas, Nikolaos Mageiras, Sofia Petropoulou, Georgios Patavoukas; **Heraklion University Hospital:** George Kochiadakis, Eleftherios Kallergis, Ioannis Anastasiou, Emmanouel Kanoupakis; **Larissa University General Hospital:** Filippos Triposkiadis, Michail Papamichalis, Apostolos Dimos, Pinelopi Karagogou; **AHEPA Hospital:** Haralambos Karvounis, George Giannakoulas, Theodoros D. Karamitsos, Georgios Deligiannis, Sofia-Anastasia Mouratoglou, Emmanouela Peteinidou.

## 2. Inclusion Criteria

- Female or male outpatients aged 40 to 80 years (inclusive) at the time of providing informed consent.
- T2DM diagnosis within 10 years prior to enrollment.
- Patients must have a high or very high CV risk, as outlined in 2019 ESC Guidelines on diabetes, pre-diabetes and CV diseases. *(Cosentino F, Grant PJ, Aboyans V, et al. 2019 ESC Guidelines on diabetes, pre-diabetes, and cardiovascular diseases developed in collaboration with the EASD. Eur Heart J 2020;41:255-323).*

### Note:

- **Very high** CV risk is defined as having either established CVD<sup>a</sup>, or other target organ damage<sup>b</sup>, or at least three major risk factors<sup>c</sup>
- **High** CV risk is defined as age  $\geq 50$  years and presence of at least one additional major risk factor

#### **a. Established CVD defined as:**

- Ischemic heart disease (IHD) (any of the following): documented myocardial infarction (MI); percutaneous coronary intervention (PCI); coronary artery bypass grafting (CABG); objective findings of coronary stenosis ( $>50\%$ ) in at least 2 coronary arteries

- *Cerebrovascular disease (CeVD) (any of the following): documented ischemic stroke (known transient ischemic attack, primary intracerebral hemorrhage or subarachnoid hemorrhage do not qualify); carotid stenting or endarterectomy*
- *Peripheral arterial disease (PAD) (any of the following): peripheral arterial stenting or surgical revascularization; lower extremity amputation as a result of peripheral arterial obstructive disease; current symptoms of intermittent claudication and ankle/brachial index <0.90 documented within the past 12 months.*
- b. Other target organ damage** *is defined as proteinuria, LVH, or retinopathy*
- c. Major risk factors** *include age, hypertension, dyslipidemia, smoking, and obesity (body mass index [BMI] ≥ 30 kg/m<sup>2</sup>)*
  - *Age ≥ 50 years*
  - *Dyslipidemia is defined as low-density lipoprotein cholesterol (LDL-C) > 130 mg/dL with the past 12 months and/or on lipid lowering therapy prescribed by a physician for dyslipidemia*
  - *Hypertension, defined as blood pressure > 140/90 mmHg at enrollment and/or on antihypertensive therapy prescribed by a physician for blood pressure lowering*
  - *Smoking is defined as tobacco use of at least 5 cigarettes/day for at least 12 months prior to enrollment.*

- Patients must have available medical records for data abstraction to meet the objectives of the study.
- Written signed and dated informed consent.

### **3. Exclusion Criteria**

- Diagnosis of type 1 DM.
- Treatment with SGLT2 inhibitor at the time of providing informed consent.
- History of HF (defined as current or previous receipt of treatment prescribed for the management of HF, and/or hospitalization for HF at any time in the past).
- Patients with limitations in their functional capacity that, as per the physician's judgment, are attributed to non-cardiac medical reason or condition (such as lung disease, musculoskeletal disorders, infection, endocrine disorders etc.).
- History of any malignancy within the 5-year period prior to enrollment (with the exception of successfully treated non-melanoma skin cancers).
- Chronic cystitis and/or recurrent genital or urinary tract infections (3 or more in the last year).
- Acute kidney injury or rapidly progressing renal disease.
- Severe renal impairment (estimated glomerular filtration rate [eGFR]  $<30$  mL/min/1.73m<sup>2</sup> using the CKD-EPI equation).
- Hematuria (confirmed by microscopic evaluation) with no explanation as judged by the study physician.

- HbA1c level  $\geq 12\%$ .
- Aspartate aminotransferase (AST) or alanine aminotransferase (ALT)  $>3$  x upper limit of normal (ULN) or total bilirubin  $>2.5$ xULN.
- Pregnant or breastfeeding patient.
- Patients with lifetime expectancy less than 2 years due to any non-CV cause or with any non-cardiac condition which, in the judgment of the Investigator, may render the patient unable to complete the study.
- Patients who are currently receiving treatment with any investigational drug/device/intervention or have received any investigational product within 1 month or 5 half-lives of the investigational agent (whichever is longer) prior to enrollment.
- Patients who have already been enrolled in this study or in a study of the same design which the physician has good reasons to believe that it is this study (to exclude enrollment of the same patient by two different sites).

#### **4. Primary Outcome**

- Proportion of patients diagnosed with symptomatic HF (Stage C) at enrollment in the overall study population.
- Proportions of patients with HF Stage A, Stage B, and Stage C at enrollment, in the overall study population and by NYHA functional classification.

## 5. Secondary Outcomes

- Proportion of patients having progressed to higher HF stage at 2 years post-enrollment in the overall study population and in the subpopulations with HF Stage A, Stage B, and Stage C at enrollment.
- Proportion of patients having progressed to higher NYHA functional class at 2 years post-enrollment in the overall study population.
- Proportion of patients having progressed to higher NYHA functional class at any time post-enrollment during the study observation period in the overall study population.
- Person-time incidence rate of symptomatic HF (Stage C or D) defined as number of patients diagnosed with symptomatic HF per patient-years of observation since enrollment, in the study subpopulation with preclinical HF (Stages A and B) at enrollment.
- 2-year cumulative incidence rate (estimated by the use of time-to-event analysis methods) of progression to symptomatic HF, in the study subpopulation with preclinical HF at enrollment.
- Person-time incidence rate of symptomatic HF defined as number of patients with symptomatic HF per patient-years of observation since enrollment, in the study subpopulation with HF Stage B at enrollment.
- 2-year cumulative incidence rate (estimated by the use of time-to-event analysis methods) of progression to symptomatic HF among patients with HF Stage B at enrollment.

- Summary statistics of clinical and echocardiographic characteristics as well as of cardiac circulating biomarkers, overall and by HF stage at enrollment.
- Proportion of patients with abnormal cardiac circulating biomarkers (NT-proBNP and hs-cTn), overall and by HF stage at enrollment.
- Proportions of patients with HFpEF, HFmrEF, and HFrEF, overall and in the subpopulations with HF Stage B and HF Stage C at enrollment.
- Proportion of patients with abnormal echocardiographic GLS (i.e, absolute value <16%), overall and in the subpopulations with HF Stage B and HF Stage C at enrollment.
- KCCQ-12 overall summary score and domain (physical limitation, symptom frequency, quality of life and social limitation) scores at enrollment and at 6 and 24 months post-enrollment, in the study subpopulation of patients diagnosed with symptomatic HF (Stage C) at enrollment.
- Change in the KCCQ-12 overall summary score and domain scores from enrollment to 6 and 24 months post-enrollment in the study subpopulation diagnosed with symptomatic HF (Stage C) at enrollment.
- Person-time incidence rate of inpatient hospitalizations, emergency room attendances, admissions to an outpatient facility, visits at office-based physicians, home visits by physicians as well as of medical procedures/interventions/diagnostic testing utilization for HF- and CV-related causes, in the overall study population and in the subpopulations with HF Stage A, Stage B, and Stage C at enrollment.
- Summary statistics of inpatient length of stay (LOS) (overall LOS, intensive care unit/high dependency unit [ICU/HDU] LOS, and non-ICU/HDU LOS) for HF- and CV-



related causes over the 2-year study observation period, in the overall study population and in the subpopulations with HF Stage A, Stage B, and Stage C at enrollment.

## **6. Exploratory Outcomes**

- Association of baseline clinical, echocardiographic and biochemical parameters with the HF stage at enrollment.
- Association of baseline clinical, echocardiographic and biochemical parameters with the presence of symptomatic HF at enrollment.
- Association of baseline clinical, echocardiographic and biochemical parameters with progression to symptomatic HF over the 2-year observation period in the study subpopulation with preclinical HF at enrollment.
- Association of changes in NT-proBNP levels between enrollment and 6 months with subsequent progression of HF (i.e., transition to a higher stage compared to 6 months) in the overall study population.
- Association of changes in NT-proBNP levels between enrollment and 6 months with subsequent occurrence of CV events of interest and hospitalization for heart failure over the study observation period.
- Proportion of patients with an episode of acute kidney injury, defined as at least doubling of serum creatinine levels from previous visit.

- Change in eGFR from baseline over the 2-year observation period in the overall study population and in the subpopulations with HF Stage A, Stage B, and Stage C at enrollment.
